# Supplementary material
Source: MDPI journal article supplement (https://www.mdpi.com/1424-8247/16/9/1325)
Supplement: s1 [file s1]

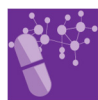

# Supplementary Materials: *Piper nigrum* extract inhibits the growth of human colorectal cancer HT-29 cells by inducing p53-mediated apoptosis

Rui Wu <sup>1</sup>, Jiajia Zhao <sup>1</sup>, Panhong Wei <sup>1</sup>, Minghai Tang <sup>2</sup>, Ziyang Ma <sup>2</sup>, Yunyan Zhao <sup>1</sup>, Leilei Du <sup>1</sup> and Li Wan <sup>1,\*</sup>

<sup>1</sup> State Key Laboratory of Southwestern Chinese Medicine Resources, School of Pharmacy, Chengdu University of Traditional Chinese Medicine, Chengdu 611137, China; wurui2298@163.com (R.W.); zjj11242020@163.com (J.Z.); wph0816@163.com (P.W.); yunyan\_zhao2022@163.com (Y.Z.); duleilei@cdutcm.edu.cn (L.D.)

<sup>2</sup> State Key Laboratory of Biotherapy and Cancer Center, National Clinical Research Center for Geriatrics, West China Hospital of Sichuan University, Chengdu 610041, China; tangminghai123@sina.cn (M.T.); maziyan@stu.scu.edu.cn (Z.M.)

\* Correspondence: wanli@cdutcm.edu.cn; Tel.: +86-15982418713

**Table S1.** Identification results of chemical components in PNE.

| No. | tr (min) | Compound                                                                                                      | Chemical formula                                            | Type            | Peak area % |
|-----|----------|---------------------------------------------------------------------------------------------------------------|-------------------------------------------------------------|-----------------|-------------|
| 1   | 4.89     | Piperine                                                                                                      | C <sub>17</sub> H <sub>19</sub> NO <sub>3</sub>             | Alkaloids       | 23.0535     |
| 2   | 10.23    | Piperolein B                                                                                                  | C <sub>21</sub> H <sub>29</sub> NO <sub>3</sub>             | Alkaloids       | 3.3270      |
| 3   | 6.47     | Gravelliferone                                                                                                | C <sub>19</sub> H <sub>22</sub> O <sub>3</sub>              | Coumarins       | 2.6384      |
| 4   | 4.50     | Piperyline                                                                                                    | C <sub>16</sub> H <sub>17</sub> NO <sub>3</sub>             | Alkaloids       | 2.4596      |
| 5   | 17.86    | Erucamide                                                                                                     | C <sub>22</sub> H <sub>43</sub> NO                          | Alkaloids       | 2.1805      |
| 6   | 7.48     | Diisobutyl phthalate                                                                                          | C <sub>16</sub> H <sub>22</sub> O <sub>4</sub>              | Esters          | 1.7972      |
| 7   | 15.67    | (2E,4E,12Z)-N-(2-methylpropyl)octadeca-2,4,12-trienamide                                                      | C <sub>22</sub> H <sub>39</sub> NO                          | Alkaloids       | 1.7744      |
| 8   | 16.54    | Stearoylglycerol                                                                                              | C <sub>21</sub> H <sub>42</sub> O <sub>4</sub>              | Esters          | 1.6109      |
| 9   | 6.47     | Pellitorine                                                                                                   | C <sub>14</sub> H <sub>25</sub> NO                          | Alkaloids       | 1.3397      |
| 10  | 8.90     | Propafenone                                                                                                   | C <sub>21</sub> H <sub>27</sub> NO <sub>3</sub>             | Phenylpropanoid | 1.2255      |
| 11  | 4.83     | Piperanine                                                                                                    | C <sub>17</sub> H <sub>21</sub> NO <sub>3</sub>             | Alkaloids       | 1.2184      |
| 12  | 13.11    | Guineensine                                                                                                   | C <sub>24</sub> H <sub>33</sub> NO <sub>3</sub>             | Alkaloids       | 1.0599      |
| 13  | 5.25     | Bis(4-ethylbenzylidene)sorbitol                                                                               | C <sub>24</sub> H <sub>30</sub> O <sub>6</sub>              | Alcohols        | 0.6262      |
| 14  | 3.44     | N-trans-Feruloyltyramine                                                                                      | C <sub>18</sub> H <sub>19</sub> NO <sub>4</sub>             | Alkaloids       | 0.4289      |
| 15  | 10.41    | (2E,4E)-N-(2-methylpropyl)dodeca-2,4-dienamide                                                                | C <sub>16</sub> H <sub>29</sub> NO                          | Alkaloids       | 0.2147      |
| 16  | 3.36     | Dipropylene glycol dimethyl ether                                                                             | C <sub>8</sub> H <sub>18</sub> O <sub>3</sub>               | Other           | 0.2102      |
| 17  | 0.69     | Trigonelline                                                                                                  | C <sub>7</sub> H <sub>7</sub> NO <sub>2</sub>               | Alkaloids       | 0.2016      |
| 18  | 15.27    | Oleoyl ethanolamide                                                                                           | C <sub>20</sub> H <sub>39</sub> NO <sub>2</sub>             | Alkaloids       | 0.1710      |
| 19  | 16.37    | Diocetyl phthalate                                                                                            | C <sub>24</sub> H <sub>38</sub> O <sub>4</sub>              | Esters          | 0.1708      |
| 20  | 13.44    | Dibutyl sebacate                                                                                              | C <sub>18</sub> H <sub>34</sub> O <sub>4</sub>              | Esters          | 0.1629      |
| 21  | 14.91    | brachystamide B                                                                                               | C <sub>26</sub> H <sub>37</sub> NO <sub>3</sub>             | Alkaloids       | 0.1214      |
| 22  | 0.67     | Asparagine                                                                                                    | C <sub>4</sub> H <sub>8</sub> N <sub>2</sub> O <sub>3</sub> | Amino acids     | 0.1211      |
| 23  | 4.35     | 3-[(2H-1,3-benzodioxol-5-yl)methyl]-4-[(3,4-dimethoxyphenyl)methyl]oxolan-2-one                               | C <sub>21</sub> H <sub>22</sub> O <sub>6</sub>              | Lignans         | 0.1137      |
| 24  | 13.93    | (2S)-2-[(2R)-7-(2-Methoxyethoxy)-5,8-dimethyl-1,2,3,4-tetrahydro-2-naphthalenyl]-1-(1-piperidiny)-1-propanone | C <sub>23</sub> H <sub>35</sub> NO <sub>3</sub>             | Alkaloids       | 0.1113      |
| 25  | 3.75     | Triethylcitrate                                                                                               | C <sub>12</sub> H <sub>20</sub> O <sub>7</sub>              | Esters          | 0.1007      |
| 26  | 0.78     | L-Malicacid                                                                                                   | C <sub>4</sub> H <sub>6</sub> O <sub>5</sub>                | Organic acids   | 0.0958      |
| 27  | 0.66     | Choline                                                                                                       | C <sub>5</sub> H <sub>13</sub> NO                           | Alkaloids       | 0.0859      |
| 28  | 0.69     | Betaine                                                                                                       | C <sub>5</sub> H <sub>11</sub> NO <sub>2</sub>              | Alkaloids       | 0.0786      |

|    |       |                                                                                                                                              |                                                               |               |        |
|----|-------|----------------------------------------------------------------------------------------------------------------------------------------------|---------------------------------------------------------------|---------------|--------|
| 29 | 2.46  | N-Methylhernagine                                                                                                                            | C <sub>20</sub> H <sub>23</sub> NO <sub>4</sub>               | Alkaloids     | 0.0777 |
| 30 | 0.69  | Gluconicacid                                                                                                                                 | C <sub>6</sub> H <sub>12</sub> O <sub>7</sub>                 | Organic acids | 0.0762 |
| 31 | 14.74 | Bis(2-ethylhexyl)phthalate                                                                                                                   | C <sub>24</sub> H <sub>38</sub> O <sub>4</sub>                | Esters        | 0.0752 |
| 32 | 7.41  | Trilostane                                                                                                                                   | C <sub>20</sub> H <sub>27</sub> NO <sub>3</sub>               | Steroids      | 0.0581 |
| 33 | 16.48 | Bis(2-ethylhexyl)adipate                                                                                                                     | C <sub>22</sub> H <sub>42</sub> O <sub>4</sub>                | Esters        | 0.0549 |
| 34 | 16.19 | PheophorbideA                                                                                                                                | C <sub>35</sub> H <sub>36</sub> N <sub>4</sub> O <sub>5</sub> | Other         | 0.0488 |
| 35 | 15.07 | Oleamide                                                                                                                                     | C <sub>18</sub> H <sub>35</sub> NO                            | Alkaloids     | 0.0466 |
| 36 | 0.74  | Adenine                                                                                                                                      | C <sub>5</sub> H <sub>5</sub> N <sub>5</sub>                  | Nucleosides   | 0.0383 |
| 37 | 0.71  | D-(-)-Fructose                                                                                                                               | C <sub>6</sub> H <sub>12</sub> O <sub>6</sub>                 | Saccharides   | 0.0381 |
| 38 | 0.90  | Acetophenone                                                                                                                                 | C <sub>8</sub> H <sub>8</sub> O                               | Other         | 0.0350 |
| 39 | 2.11  | decaffeoylverbascoside                                                                                                                       | C <sub>20</sub> H <sub>30</sub> O <sub>12</sub>               | Glycosides    | 0.0261 |
| 40 | 14.61 | Hexadecanamide                                                                                                                               | C <sub>16</sub> H <sub>33</sub> NO                            | Alkaloids     | 0.0253 |
| 41 | 5.39  | (3aR,4aS,5R,6S,8S,9aR)-5,6-dihydroxy-4a,8-dimethyl-3-methylenedecahydroazuleno[6,5-b]furan-2(3H)-one                                         | C <sub>15</sub> H <sub>22</sub> O <sub>4</sub>                | Esters        | 0.0247 |
| 42 | 4.02  | N-Butylbenzenesulfonamide                                                                                                                    | C <sub>10</sub> H <sub>15</sub> NO <sub>2</sub> S             | Alkaloids     | 0.0230 |
| 43 | 11.16 | 2-Amino-1,3,4-octadecanetriol                                                                                                                | C <sub>18</sub> H <sub>39</sub> NO <sub>3</sub>               | Alcohols      | 0.0219 |
| 44 | 0.90  | 4-Oxoproline                                                                                                                                 | C <sub>5</sub> H <sub>7</sub> NO <sub>3</sub>                 | Amino acids   | 0.0213 |
| 45 | 1.27  | DL-Norleucine                                                                                                                                | C <sub>6</sub> H <sub>13</sub> NO <sub>2</sub>                | Amino acids   | 0.0188 |
| 46 | 0.89  | L-Pyroglutamicacid                                                                                                                           | C <sub>5</sub> H <sub>7</sub> NO <sub>3</sub>                 | Amino acids   | 0.0185 |
| 47 | 3.34  | BetulalbusideA                                                                                                                               | C <sub>16</sub> H <sub>28</sub> O <sub>7</sub>                | Glycosides    | 0.0168 |
| 48 | 14.79 | (2E,4E,9Z)-1-(piperidin-1-yl)hexadeca-2,4,9-trien-1-one                                                                                      | C <sub>21</sub> H <sub>35</sub> NO                            | Alkaloids     | 0.0155 |
| 49 | 0.68  | 4-Aminobutyricacid                                                                                                                           | C <sub>4</sub> H <sub>9</sub> NO <sub>2</sub>                 | Amino acids   | 0.0154 |
| 50 | 6.33  | 3,5-di-tert-Butyl-4-hydroxybenzaldehyde                                                                                                      | C <sub>15</sub> H <sub>22</sub> O <sub>2</sub>                | Phenols       | 0.0153 |
| 51 | 4.66  | Benzophenone                                                                                                                                 | C <sub>13</sub> H <sub>10</sub> O                             | Other         | 0.0144 |
| 52 | 3.61  | Azelaicacid                                                                                                                                  | C <sub>9</sub> H <sub>16</sub> O <sub>4</sub>                 | Organic acids | 0.0130 |
| 53 | 0.90  | Guanosine                                                                                                                                    | C <sub>10</sub> H <sub>13</sub> N <sub>5</sub> O <sub>5</sub> | Nucleosides   | 0.0127 |
| 54 | 8.28  | Dodecylsulfate                                                                                                                               | C <sub>12</sub> H <sub>26</sub> O <sub>4</sub> S              | Organic acids | 0.0125 |
| 55 | 0.90  | N-Acetyl-DL-glutamicacid                                                                                                                     | C <sub>7</sub> H <sub>11</sub> NO <sub>5</sub>                | Amino acids   | 0.0124 |
| 56 | 5.62  | methyl3-((1E,3E)-3,5-dimethylhepta-1,3-dien-1-yl)-8-hydroxy-6a,8-dimethyl-6-oxo-6a,8,9,9a-tetrahydro-6H-furo[2,3-h]isochromene-9-carboxylate | C <sub>24</sub> H <sub>30</sub> O <sub>6</sub>                | Other         | 0.0117 |
| 57 | 4.22  | Monobutylphthalate                                                                                                                           | C <sub>12</sub> H <sub>14</sub> O <sub>4</sub>                | Esters        | 0.0116 |
| 58 | 0.68  | L-Asparticacid                                                                                                                               | C <sub>4</sub> H <sub>7</sub> NO <sub>4</sub>                 | Amino acids   | 0.0109 |
| 59 | 4.98  | 6-Gingerol                                                                                                                                   | C <sub>17</sub> H <sub>26</sub> O <sub>4</sub>                | Phenols       | 0.0107 |
| 60 | 2.58  | Isophthalicacid                                                                                                                              | C <sub>8</sub> H <sub>6</sub> O <sub>4</sub>                  | Organic acids | 0.0107 |
| 61 | 1.69  | 2-Phenylglycine                                                                                                                              | C <sub>8</sub> H <sub>9</sub> NO <sub>2</sub>                 | Amino acids   | 0.0106 |
| 62 | 0.75  | Guanine                                                                                                                                      | C <sub>5</sub> H <sub>5</sub> N <sub>5</sub> O                | Nucleosides   | 0.0104 |
| 63 | 0.71  | D-Proline                                                                                                                                    | C <sub>5</sub> H <sub>9</sub> NO <sub>2</sub>                 | Amino acids   | 0.0103 |
| 64 | 12.12 | tetradecylhydrogensulphate                                                                                                                   | C <sub>14</sub> H <sub>30</sub> O <sub>4</sub> S              | Organic acids | 0.0094 |
| 65 | 2.82  | 4-Nitrophenol                                                                                                                                | C <sub>6</sub> H <sub>5</sub> NO <sub>3</sub>                 | Phenols       | 0.0089 |
| 66 | 2.11  | [(2R,3S,4S,5R,6R)-3,4,5-trihydroxy-6-[2-(3-hydroxy-5-oxoxolan-3-yl)propoxy]oxan-2-yl]methyl(2E)-3-(3,4-dihydroxyphenyl)prop-2-enoate         | C <sub>22</sub> H <sub>28</sub> O <sub>12</sub>               | Glycosides    | 0.0084 |
| 67 | 4.57  | 4,5-Dihydropiperlonguminine                                                                                                                  | C <sub>16</sub> H <sub>21</sub> NO <sub>3</sub>               | Alkaloids     | 0.0084 |
| 68 | 3.42  | D-Panthenol                                                                                                                                  | C <sub>9</sub> H <sub>19</sub> NO <sub>4</sub>                | Alcohols      | 0.0084 |
| 69 | 1.81  | Pantothenicacid                                                                                                                              | C <sub>9</sub> H <sub>17</sub> NO <sub>5</sub>                | Organic acids | 0.0081 |
| 70 | 1.72  | L-Phenylalanine                                                                                                                              | C <sub>9</sub> H <sub>11</sub> NO <sub>2</sub>                | Amino acids   | 0.0078 |
| 71 | 0.78  | Pipecolicacid                                                                                                                                | C <sub>6</sub> H <sub>11</sub> NO <sub>2</sub>                | Amino acids   | 0.0077 |
| 72 | 2.96  | Eriocitrin                                                                                                                                   | C <sub>27</sub> H <sub>32</sub> O <sub>15</sub>               | Glycosides    | 0.0067 |
| 73 | 0.95  | Succinicacid                                                                                                                                 | C <sub>4</sub> H <sub>6</sub> O <sub>4</sub>                  | Organic acids | 0.0066 |
| 74 | 12.26 | 4-Dodecylbenzenesulfonicacid                                                                                                                 | C <sub>18</sub> H <sub>30</sub> O <sub>3</sub> S              | Organic acids | 0.0065 |

|    |       |                                                                                                                    |                                                              |                 |        |
|----|-------|--------------------------------------------------------------------------------------------------------------------|--------------------------------------------------------------|-----------------|--------|
| 75 | 2.17  | Indole-3-acrylicacid                                                                                               | C <sub>11</sub> H <sub>9</sub> NO <sub>2</sub>               | Organic acids   | 0.0063 |
| 76 | 0.88  | Uridine                                                                                                            | C <sub>9</sub> H <sub>12</sub> N <sub>2</sub> O <sub>6</sub> | Nucleosides     | 0.0058 |
| 77 | 10.66 | 5-OxoETE                                                                                                           | C <sub>20</sub> H <sub>30</sub> O <sub>3</sub>               | Organic acids   | 0.0056 |
| 78 | 6.99  | Mono(2-ethylhexyl)phthalate                                                                                        | C <sub>16</sub> H <sub>22</sub> O <sub>4</sub>               | Organic acids   | 0.0047 |
| 79 | 0.92  | D-(+)-Malicacid                                                                                                    | C <sub>4</sub> H <sub>6</sub> O <sub>5</sub>                 | Organic acids   | 0.0044 |
| 80 | 10.66 | 12,13-dihydroxy-9-octadecenoicacid                                                                                 | C <sub>18</sub> H <sub>34</sub> O <sub>4</sub>               | Organic acids   | 0.0039 |
| 81 | 3.68  | 4-Methoxycinnamaldehyde                                                                                            | C <sub>10</sub> H <sub>10</sub> O <sub>2</sub>               | Phenylpropanoid | 0.0035 |
| 82 | 2.58  | 2-(3,4-Dihydroxyphenyl)-5-hydroxy-4-oxo-4H-chromen-7-yl6-O-(6-deoxy-alpha-L-mannopyranosyl)-beta-D-glucopyranoside | C <sub>27</sub> H <sub>30</sub> O <sub>15</sub>              | Glycosides      | 0.0034 |
| 83 | 1.66  | 3-Hydroxymandelicacid                                                                                              | C <sub>8</sub> H <sub>8</sub> O <sub>4</sub>                 | Organic acids   | 0.0034 |
| 84 | 1.57  | Salsoline                                                                                                          | C <sub>11</sub> H <sub>15</sub> NO <sub>2</sub>              | Alkaloids       | 0.0031 |
| 85 | 0.88  | L-citramalicacid                                                                                                   | C <sub>5</sub> H <sub>8</sub> O <sub>5</sub>                 | Organic acids   | 0.0030 |
| 86 | 1.91  | Protocatechuicacid                                                                                                 | C <sub>7</sub> H <sub>6</sub> O <sub>4</sub>                 | Phenols         | 0.0025 |
| 87 | 16.31 | Elaidicacid                                                                                                        | C <sub>18</sub> H <sub>34</sub> O <sub>2</sub>               | Organic acids   | 0.0025 |
| 88 | 2.79  | N-Acetyl-D-alloisoleucine                                                                                          | C <sub>8</sub> H <sub>15</sub> NO <sub>3</sub>               | Amino acids     | 0.0022 |
| 89 | 4.39  | (+)-trans-C75                                                                                                      | C <sub>14</sub> H <sub>22</sub> O <sub>4</sub>               | Esters          | 0.0021 |
| 90 | 3.40  | 9-(2,3-dihydroxypropoxy)-9-oxononanoicacid                                                                         | C <sub>12</sub> H <sub>22</sub> O <sub>6</sub>               | Organic acids   | 0.0020 |
| 91 | 1.66  | Gentisicacid5-O-β-D-glucopyranoside                                                                                | C <sub>13</sub> H <sub>16</sub> O <sub>9</sub>               | Glycosides      | 0.0020 |
| 92 | 2.27  | osmanthusideH                                                                                                      | C <sub>19</sub> H <sub>28</sub> O <sub>11</sub>              | Glycosides      | 0.0019 |
| 93 | 15.37 | 17-Octadecynoicacid                                                                                                | C <sub>18</sub> H <sub>32</sub> O <sub>2</sub>               | Organic acids   | 0.0018 |
| 94 | 1.89  | Vanillylalcohol                                                                                                    | C <sub>8</sub> H <sub>10</sub> O <sub>3</sub>                | Phenols         | 0.0017 |
| 95 | 14.42 | 16-Hydroxyhexadecanoicacid                                                                                         | C <sub>16</sub> H <sub>32</sub> O <sub>3</sub>               | Organic acids   | 0.0016 |
| 96 | 6.04  | perfluorooctane-1-sulfonicacid                                                                                     | C <sub>8</sub> HF <sub>17</sub> O <sub>3</sub> S             | Organic acids   | 0.0010 |
| 97 | 4.68  | Dodecanedioicacid                                                                                                  | C <sub>12</sub> H <sub>22</sub> O <sub>4</sub>               | Organic acids   | 0.0008 |

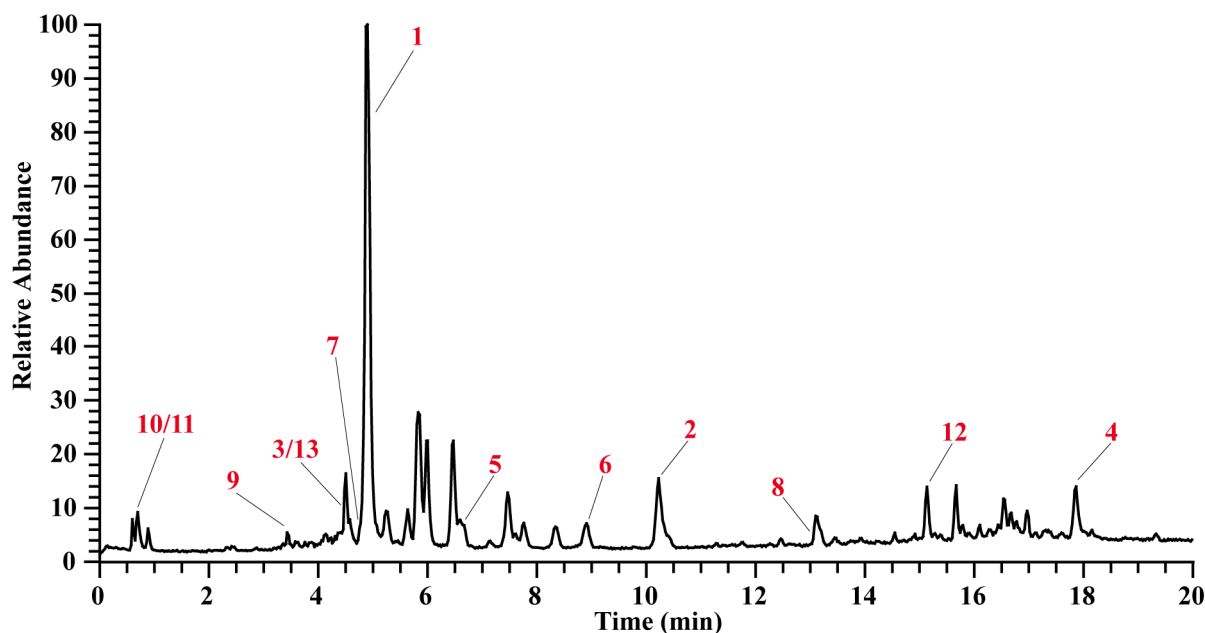

**Figure S1.** Total ions current (TIC) of the main pharmacological active compounds in PNE.
